# Supplementary material for: An archaeal origin of eukaryotes supports only two primary domains of life
Source: Springer Nature journal article supplement (doi:10.1038/nature12779), 2013-12-01
Supplement: 41586_2013_BFnature12779_MOESM52_ESM.pdf [file 41586_2013_BFnature12779_MOESM52_ESM.pdf]

**Supplementary Table 1: Gene presence and absence data presented in Figure 2 of the main text.**

When considering patterns of gene sharing between eukaryotes and the Archaea, at least three classes of genes are evident. The first comprises cases in which orthologues of the eukaryotic gene are conserved across the Archaea, and sometimes also in Bacteria; these include among their number the core gene set used in analyses upon which the tree in Figure 2 is based. The second class includes eukaryotic genes such as actin<sup>1</sup>, tubulin<sup>2</sup> and proteins of the ubiquitin modification system<sup>3</sup>. These genes may form large gene families, for example the tubulin/FtsZ gene family, and may have detectable dispersed paralogues among prokaryotes generally, but for which putative orthologues<sup>2</sup> to eukaryotic versions have so far been detected only among the TACK Archaea. The third class includes genes that have so far been found only in eukaryotes and the TACK Archaea; these include several genes involved in transcription and translation, as detailed below.

| Gene                                                            | Representative archaeal species   | NCBI Accession (GI)                        | Reference      | Basis for orthology inference         |
|-----------------------------------------------------------------|-----------------------------------|--------------------------------------------|----------------|---------------------------------------|
| Actin (Crenactin)                                               | <i>Thermofilum pendens</i>        | 119719444                                  | <sup>1</sup>   | Tree                                  |
| Tubulin (artubulin)                                             | <i>Nitrosoarchaeum limnia</i>     | 494643832                                  | <sup>2</sup>   | Tree                                  |
| Ubiquitin system (Ub, E1, E2, RING-finger containing Ub ligase) | <i>Caldiarchaeum subterraneum</i> | 343485671, 343485673, 343485672, 343485674 | <sup>3</sup>   | Sequence similarity, operon structure |
| Elongation factor Elf1                                          | <i>Sulfolobus solfataricus</i>    | 13813400                                   | <sup>4,5</sup> | Not detected outside group            |
| RNA polymerase RpoG/Rpb8                                        | <i>Thermofilum pendens</i>        | 119719267                                  | <sup>6</sup>   | Not detected outside group            |
| Ribosomal protein S25e                                          | <i>Thermofilum pendens</i>        | 119719924                                  | <sup>4</sup>   | Not detected outside group            |
| Ribosomal protein S30e                                          | <i>Thermofilum pendens</i>        | 119719279                                  | <sup>4</sup>   | Not detected outside group            |
| Ribosomal protein L13e                                          | <i>Thermofilum pendens</i>        | 119719644                                  | <sup>4</sup>   | Not detected outside group            |
| Ribosomal protein L38e                                          | <i>Aeropyrum pernix</i>           | 499163706                                  | <sup>4</sup>   | Not detected                          |

|  |  |  |  |               |
|--|--|--|--|---------------|
|  |  |  |  | outside group |
|--|--|--|--|---------------|

**Supplementary Table 2: An amino acid insertion in the elongation factor 1-alpha genes of eukaryotes and certain Archaea.** An insertion<sup>7</sup> is present in the Thaumarchaeota, Aigarchaeota and Crenarchaeota highlighted in Figure 2; this insertion is apparently missing from *Korarchaeum cryptophilum*. The coordinates provided refer to the portion of the insertion that is readily alignable among the compared sequences.

| Species                            | Elongation factor 1-alpha accession | Amino acid coordinates |
|------------------------------------|-------------------------------------|------------------------|
| <i>Caldiarchaenum subterraneum</i> | 315425766                           | 120-127                |
| <i>Cenarchaeum symbiosum</i>       | 118575602                           | 125-132                |
| <i>Nitrosopumilus maritimus</i>    | 161528542                           | 121-128                |
| <i>Nitrosoarchaeum limnia</i>      | 494643908                           | 121-129                |
| <i>Thermofilum pendens</i>         | 119719557                           | 121-128                |
| <i>Pyrobaculum aerophilum</i>      | 18313751                            | 131-138                |
| <i>Caldivirga maquilingensis</i>   | 159042306                           | 130-137                |
| <i>Sulfolobus solfataricus</i>     | 15897164                            | 120-127                |
| <i>Ignicoccus hospitalis</i>       | 156937938                           | 122-129                |
| <i>Staphylothermus marinus</i>     | 126465710                           | 121-128                |
| <i>Hyperthermus butylicus</i>      | 124028427                           | 121-128                |
| <i>Aeropyrum pernix</i>            | 14601666                            | 120-127                |

- 1 Ettema, T. J., Lindas, A. C. & Bernander, R. An actin-based cytoskeleton in archaea. *Mol Microbiol* **80**, 1052-1061 (2011).
- 2 Yutin, N. & Koonin, E. V. Archaeal origin of tubulin. *Biol Direct* **7**, 10 (2012).
- 3 Nunoura, T. *et al.* Insights into the evolution of Archaea and eukaryotic protein modifier systems revealed by the genome of a novel archaeal group. *Nucleic Acids Res* **39**, 3204-3223 (2011).

- 4 Guy, L. & Ettema, T. J. The archaeal 'TACK' superphylum and the origin of eukaryotes. *Trends Microbiol* **19**, 580-587 (2011).
- 5 Daniels, J. P., Kelly, S., Wickstead, B. & Gull, K. Identification of a crenarchaeal orthologue of Elf1: implications for chromatin and transcription in Archaea. *Biol Direct* **4**, 24 (2009).
- 6 Koonin, E. V., Makarova, K. S. & Elkins, J. G. Orthologs of the small RPB8 subunit of the eukaryotic RNA polymerases are conserved in hyperthermophilic Crenarchaeota and "Korarchaeota". *Biol Direct* **2**, 38 (2007).
- 7 Rivera, M. C. & Lake, J. A. Evidence that eukaryotes and eocyte prokaryotes are immediate relatives. *Science* **257**, 74-76 (1992).
